# Supplementary material for: Peptide-Based Hydrogels and Nanogels Containing Gd(III) Complexes as T1 Relaxation Agents
Source: Pharmaceuticals (Basel). 2022 Dec 16;15(12):1572. doi: 10.3390/ph15121572 (PMC9787396; doi:10.3390/ph15121572)
Supplement: Supplementary file 1 [file pharmaceuticals-15-01572-s001.zip › pharmaceuticals-2064170-supplementary.pdf]

## **Supporting Information**

### **Peptide-based hydrogels and nanogels containing Gd(III) complexes as $T_1$ relaxation agents**

Elisabetta Rosa,<sup>1</sup> Fabio Carniato,<sup>2</sup> Lorenzo Tei,<sup>2</sup> Carlo Diaferia,<sup>1</sup> Giancarlo Morelli,<sup>1</sup> Mauro Botta<sup>2</sup>,  
Antonella Accardo<sup>1</sup>

<sup>1</sup>Department of Pharmacy, Research Centre on Bioactive Peptides (CIRPeB), University of Naples  
“Federico II”, Via Montesano 49, 80131 Naples (Italy)

<sup>2</sup> Department of Science and Technological Innovation, University of Piemonte Orientale "A.  
Avogadro", Viale T. Michel 11, 15121 Alessandria (Italy)

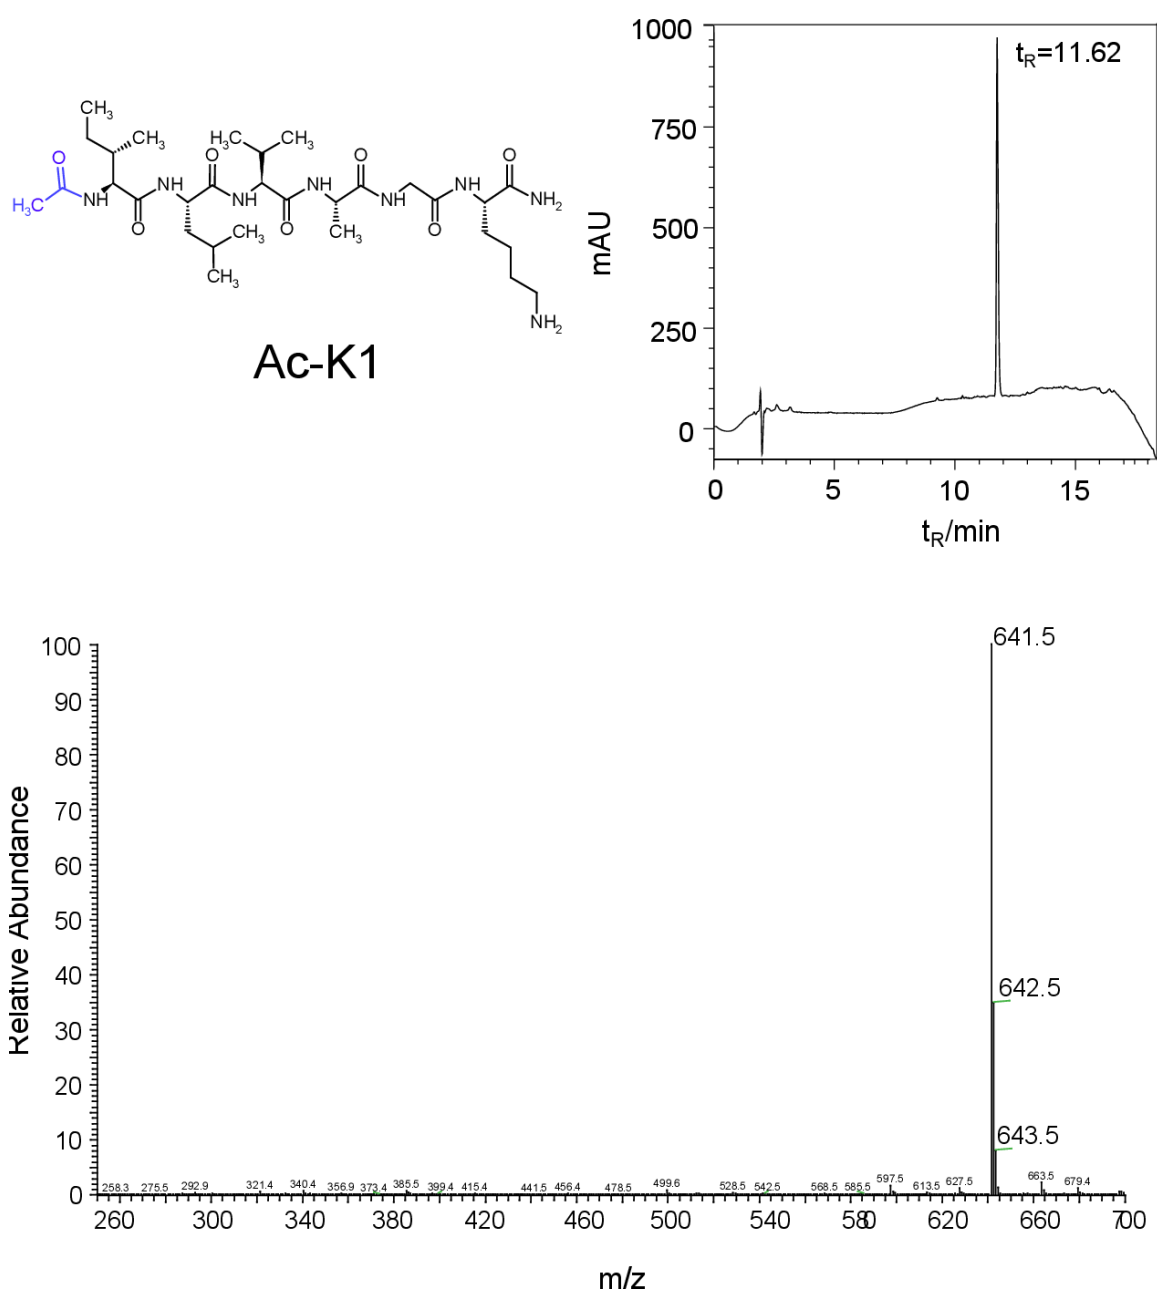

**Figure S1:** Chemical structure of Ac-K1 peptide with the corresponding RP-HPLC chromatogram and ESI mass spectrum

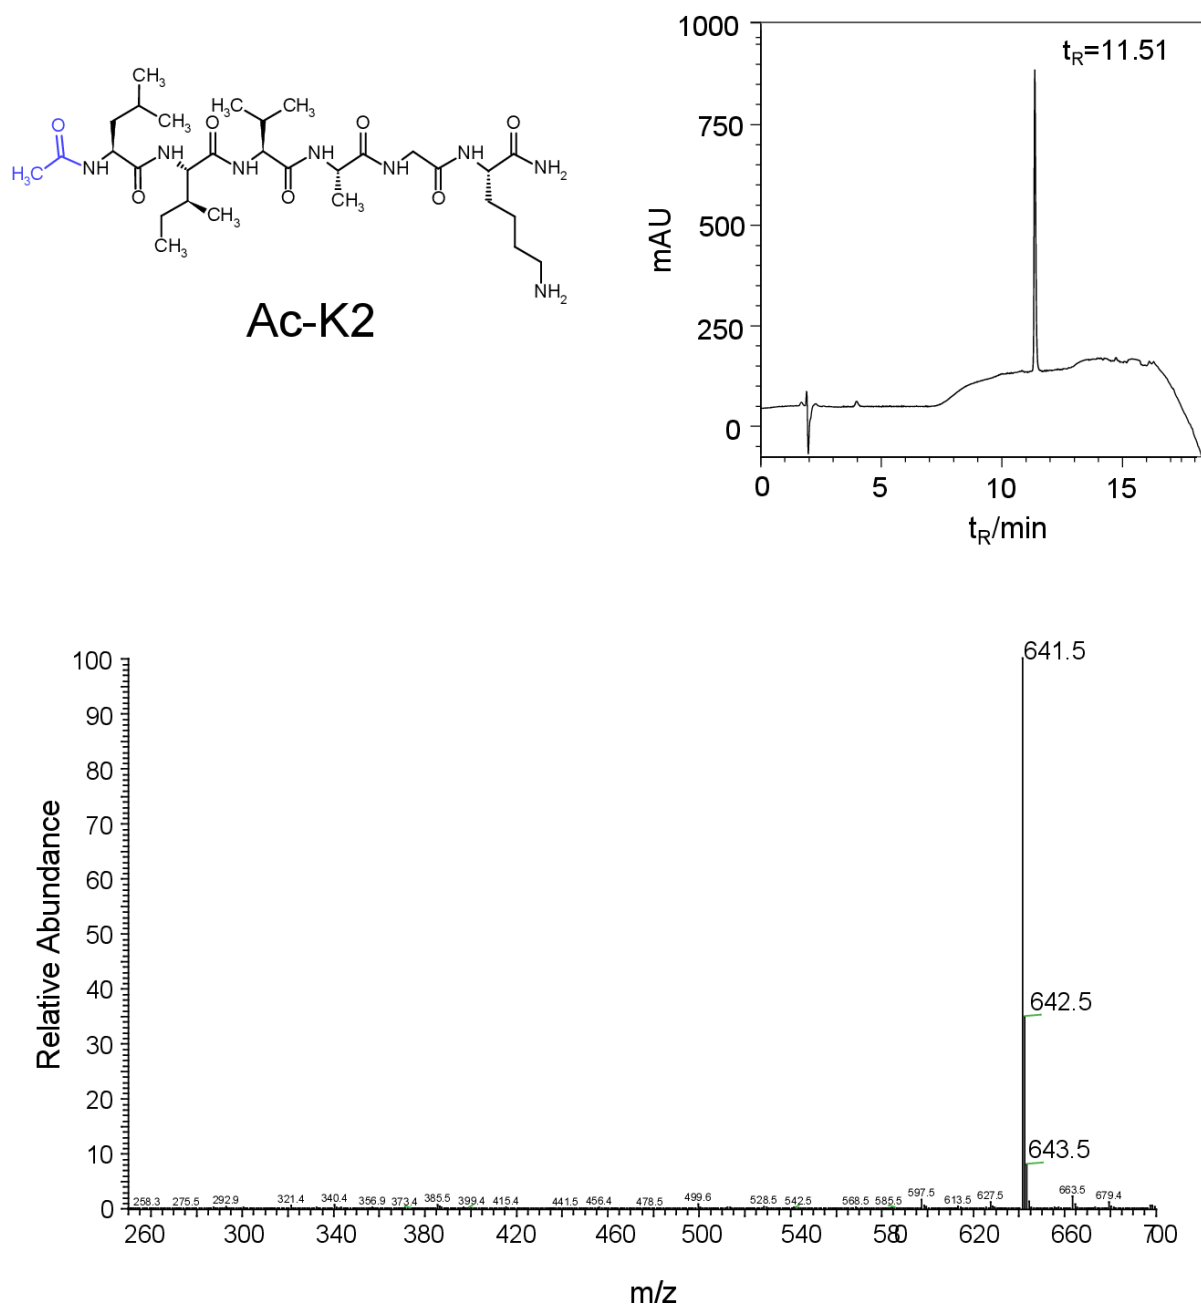

**Figure S2:** Chemical structure of Ac-K2 peptide with the corresponding RP-HPLC chromatogram and ESI mass spectrum

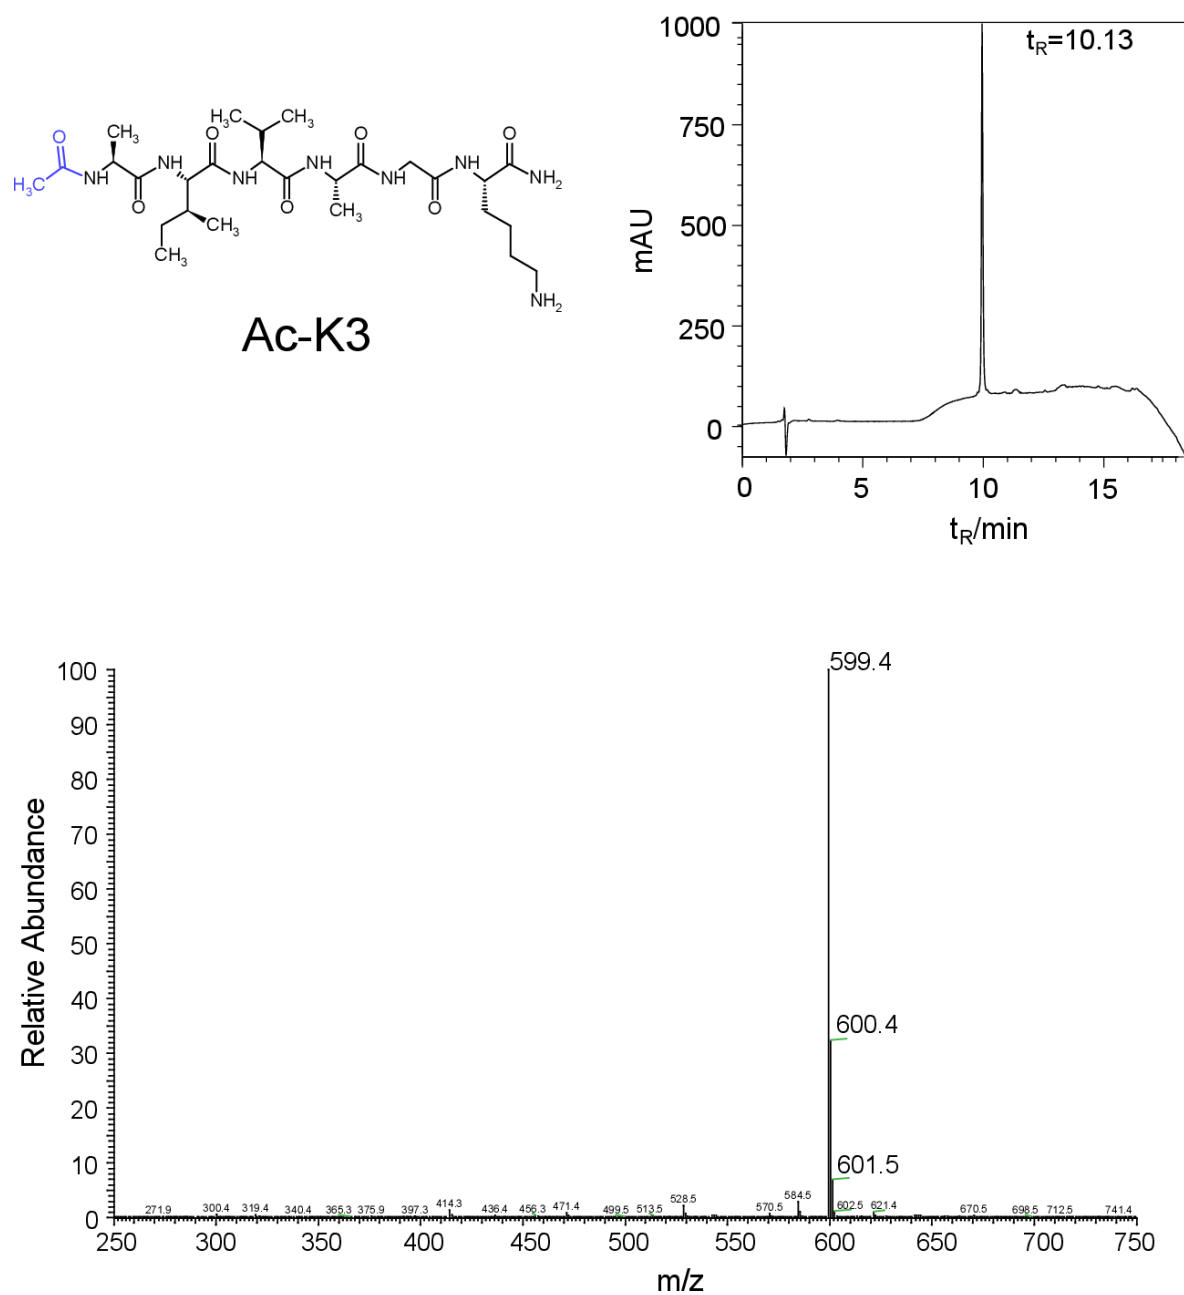

**Figure S3:** Chemical structure of Ac-K3 peptide with the corresponding RP-HPLC chromatogram and ESI mass spectrum

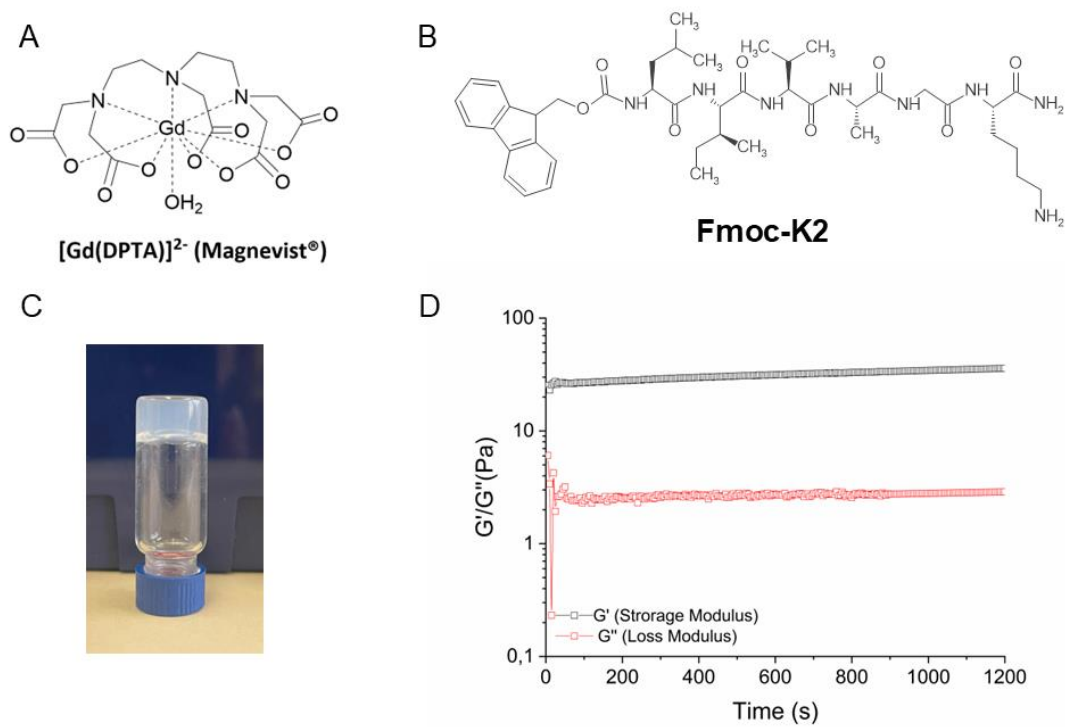

**Figure S4:** Schematic representation of  $[Gd(DTPA)]^{2-}$  complex (A) and of Fmoc-K2 peptide (B). C) Inverted tube test for  $[Gd(DTPA)]^{2-}$  filled Fmoc-K2 hydrogel. D) Time sweep rheological analysis of Fmoc-K2 hydrogel loaded with  $[Gd(DTPA)]^{2-}$  reported as storage modulus ( $G'$ ) and loss modulus ( $G''$ ).

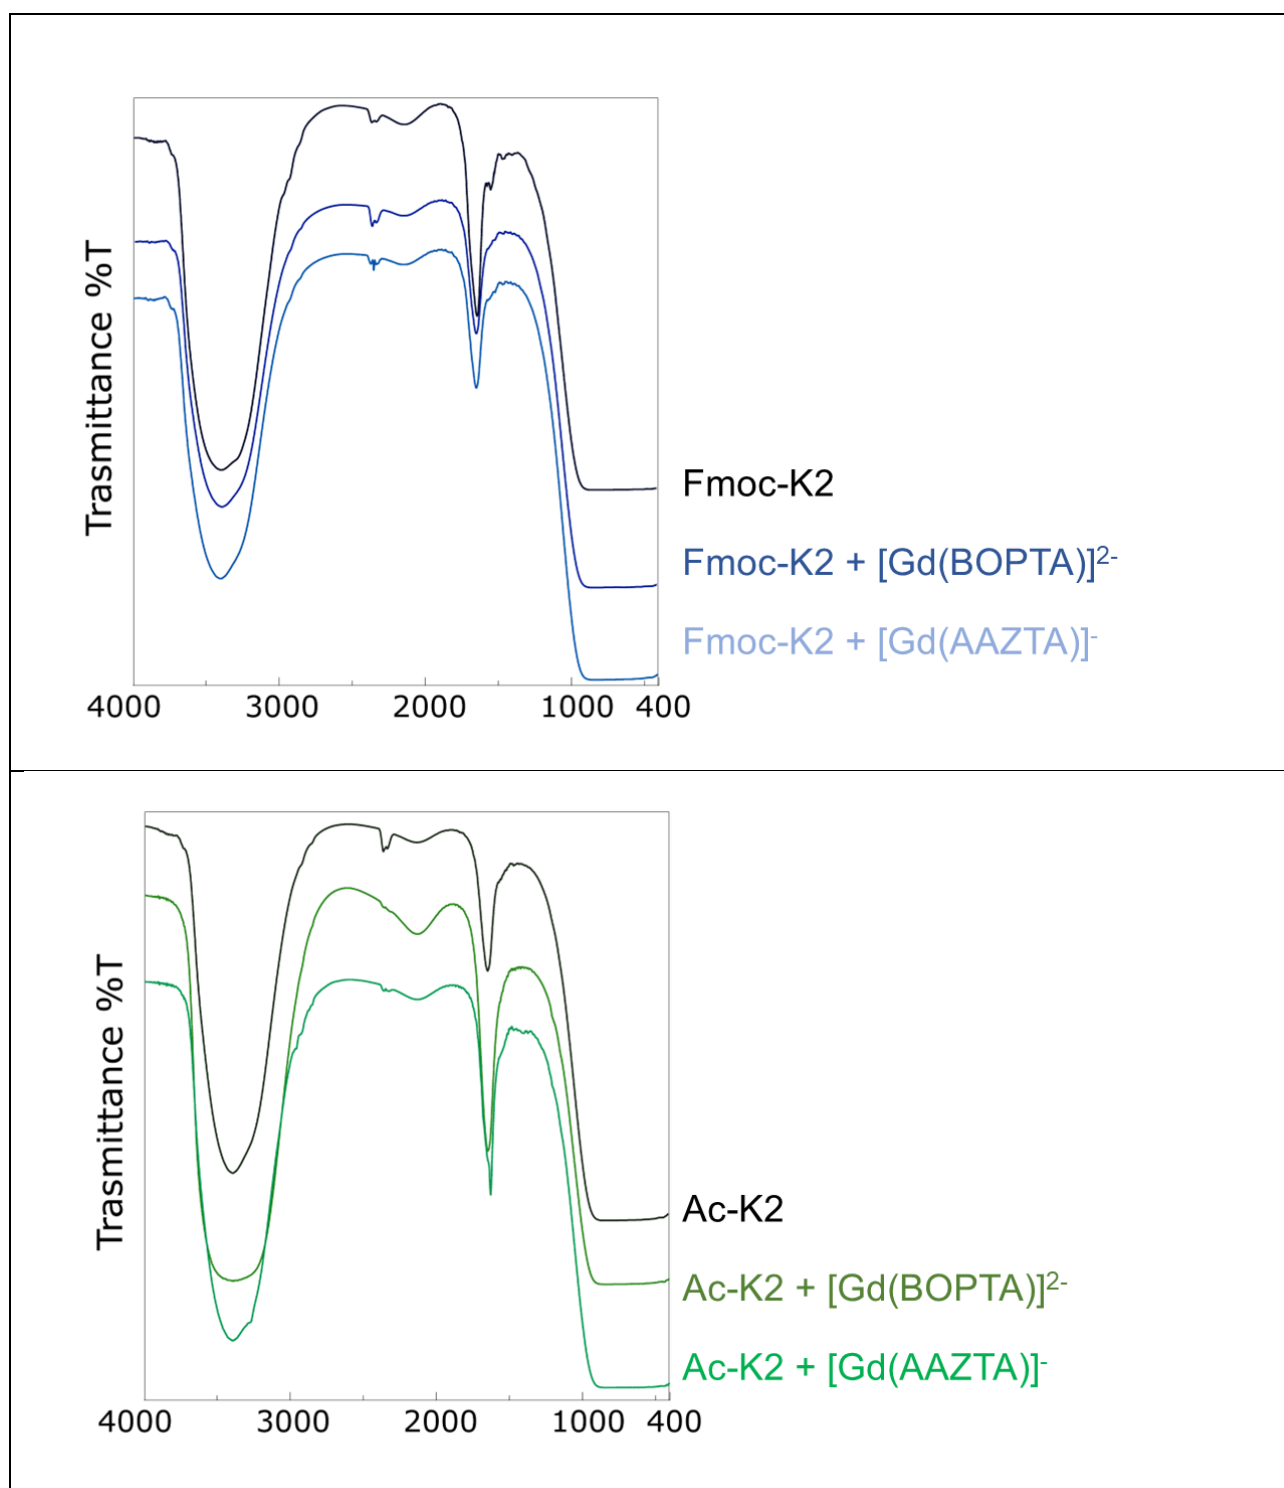

**Figure S5:** FTIR spectra of Fmoc-K2 and Ac-K2 empty hydrogels compared with hydrogels loaded with [Gd(BOPTA)]<sup>2-</sup> or [Gd(AAZTA)]<sup>-</sup> complexes.

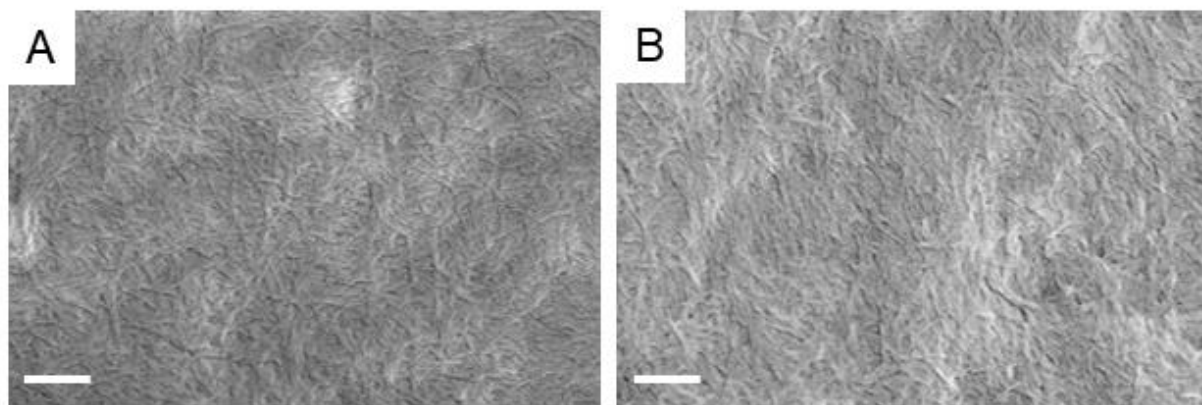

**Figure S6:** SEM micro-photos of Fmoc-K2 (A) and Fmoc-K3 (B) loaded with  $[\text{Gd}(\text{AAZTA})]^-$  (scale bar is 500 nm).

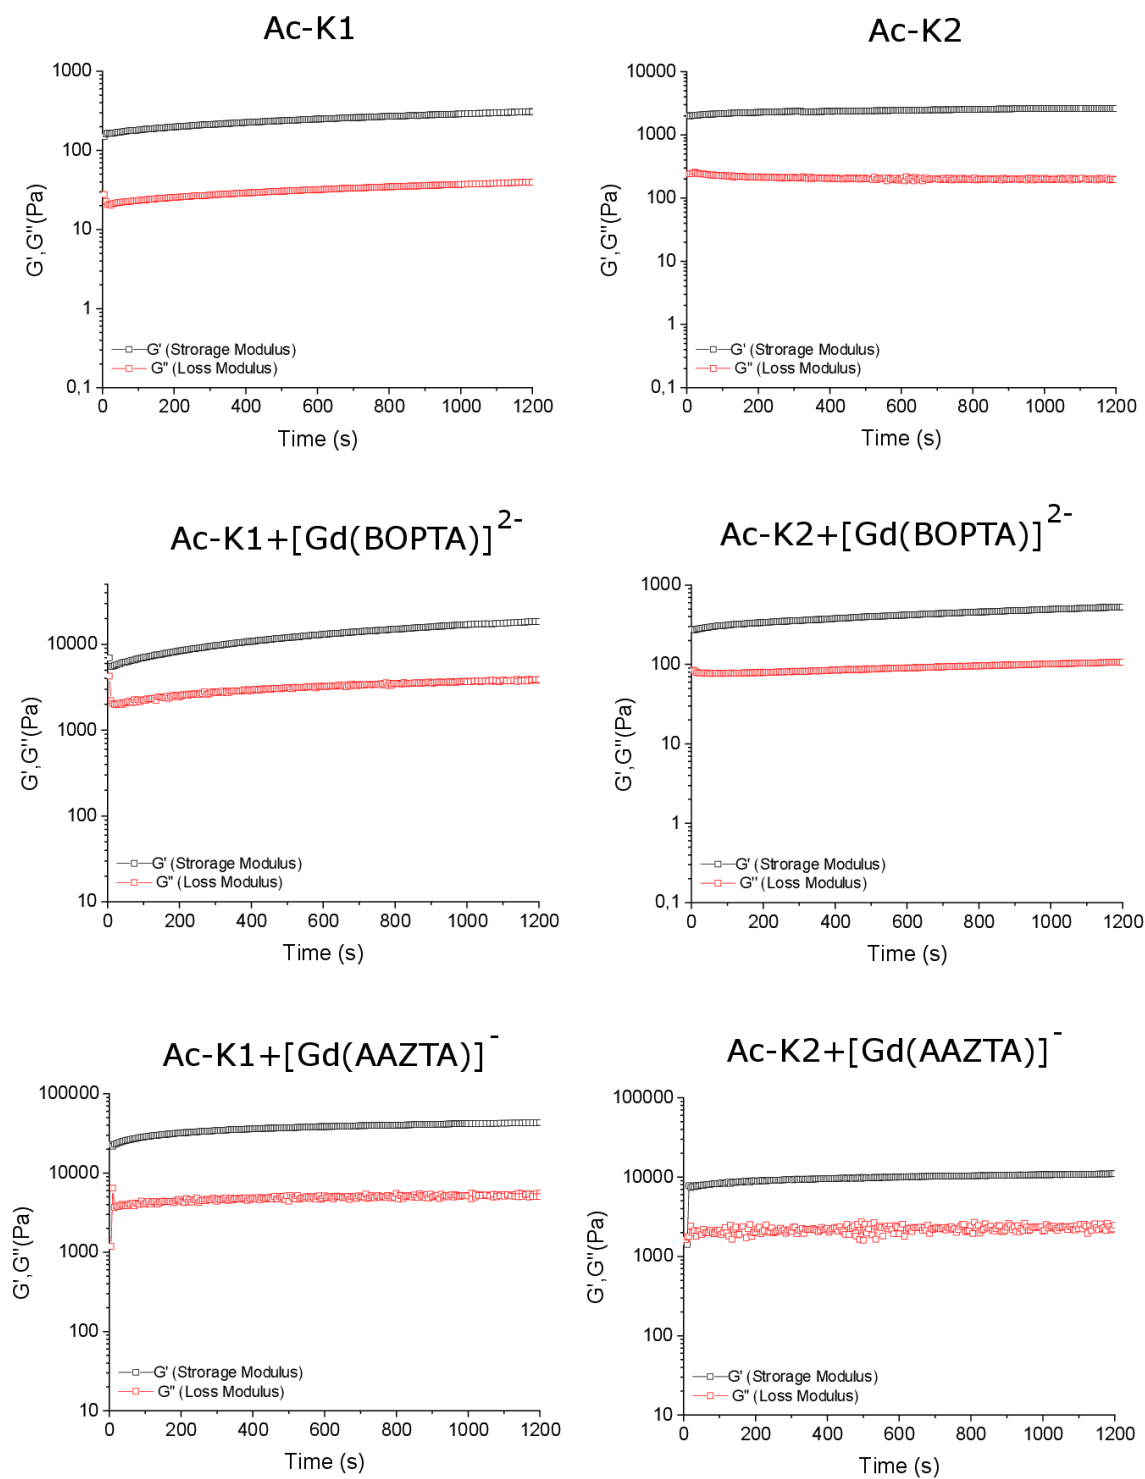

**Figure S7:** Rheological profiles of time sweep measurements for Ac-peptide series.  $G'$  and  $G''$  are graphed in black and red, respectively.

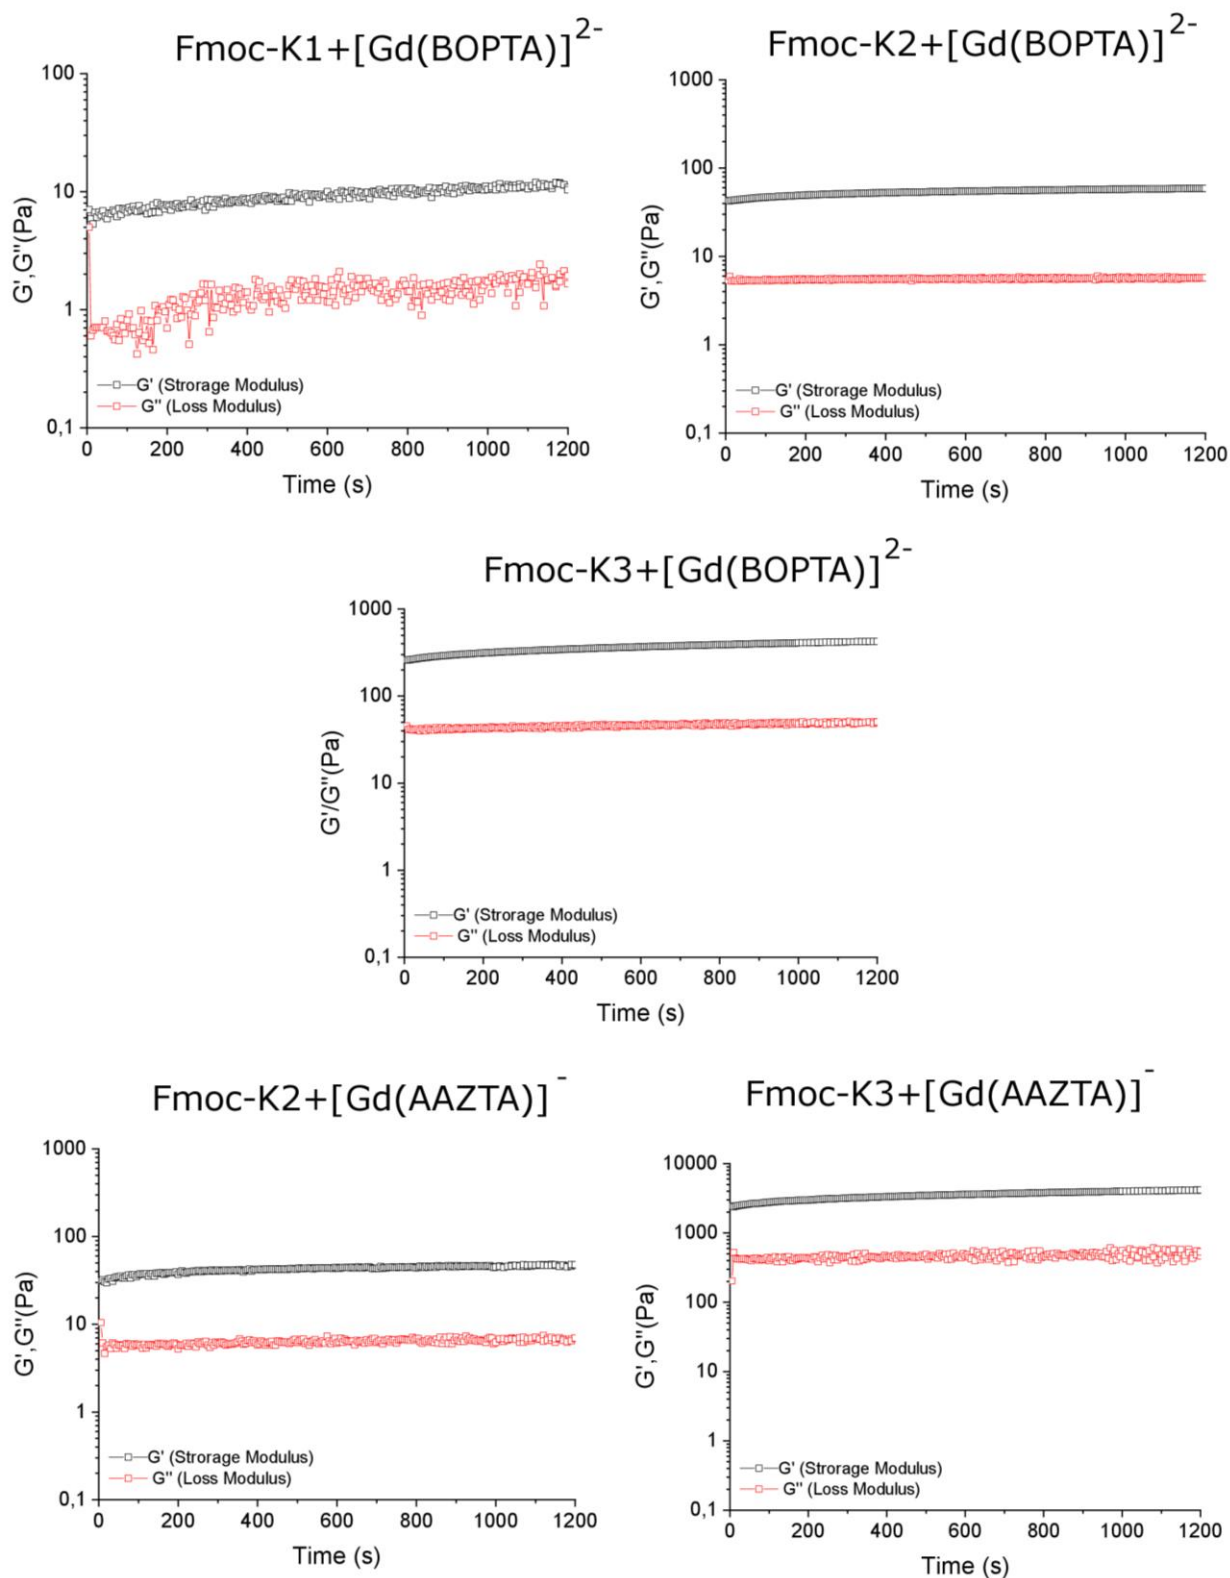

**Figure S8:** Rheological profiles of time sweep measurements for Fmoc-peptide series.  $G'$  and  $G''$  are graphed in black and red, respectively.

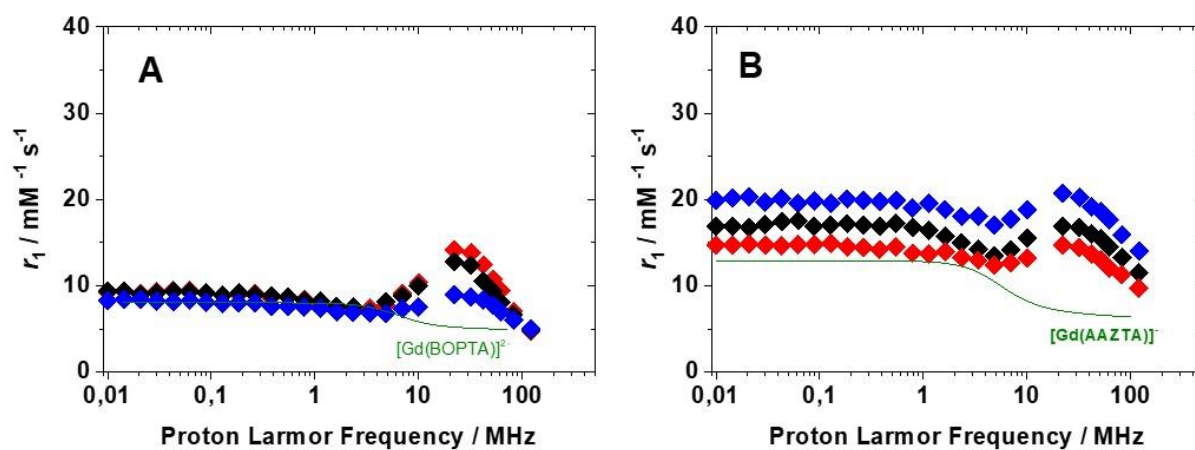

**Figure S9:**  $^1\text{H}$  NMRD profiles of  $\text{Fmoc-K3} + [\text{Gd}(\text{BOPTA})]^{2-}$  (A),  $\text{Fmoc-K3} + [\text{Gd}(\text{AAZTA})]^-$  (B) at 283 (blue), 298 (black) and 310 K (red). The profiles of the corresponding chelates in aqueous solution are also reported as solid lines.

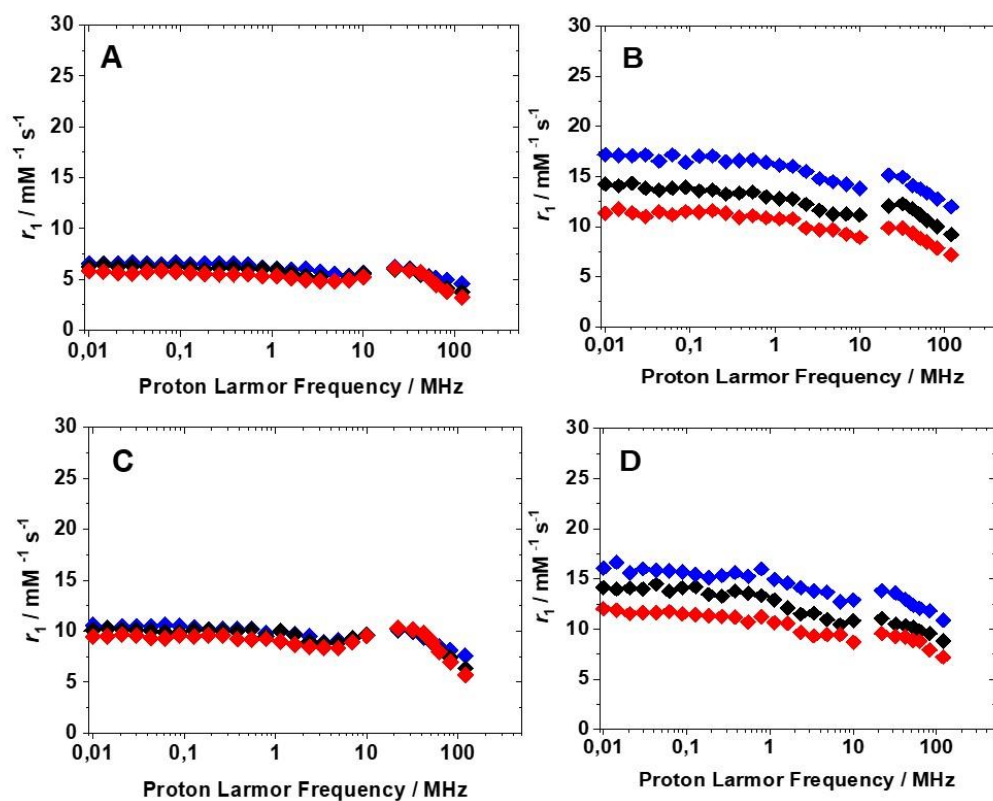

**Figure S10:**  $^1\text{H}$  NMRD profiles of  $\text{Ac-K1} + [\text{Gd}(\text{BOPTA})]^{2-}$  (A),  $\text{Ac-K1} + [\text{Gd}(\text{AAZTA})]^-$  (B),  $\text{Ac-K2} + [\text{Gd}(\text{BOPTA})]^{2-}$  (C),  $\text{Ac-K2} + [\text{Gd}(\text{AAZTA})]^-$  (D) at 283 (blue), 298 (black) and 310 K (red).
